# Supplementary material for: Hevin Plays a Pivotal Role in Corneal Wound Healing
Source: PubMed Central journal article supplement (PMC3841198; doi:10.1371/journal.pone.0081544), 2013-11-26
Supplement: pone.0081544.s001.pdf [file pone.0081544.s001.pdf]

**Table S1. List of Antibodies used in the study.**

| Primary Antibody | Type              | Dilution Factor |       |
|------------------|-------------------|-----------------|-------|
|                  |                   | IHC-Fr          | WB    |
| $\alpha$ SMA     | Rabbit monoclonal | 1:50            | 1:100 |
| CD11b            | Rat monoclonal    | 1:100           | 1:200 |
| VEGF             | Rabbit polyclonal | 1:100           | 1:100 |
| Hevin            | Mouse monoclonal  | 1:50            | NA    |
| Collagen 1       | Rabbit polyclonal | 1:100           | 1:100 |
| Collagen iv      | Rabbit polyclonal | 1:100           | 1:100 |
